# Supplementary material for: A Machine Learning Framework for Osteoarthritis Risk Prediction in Metabolic Syndrome: NHANES-Based Model Development and Clinical Tool Validation
Source: Research Square preprint supplement (doi:10.21203/rs.3.rs-7261040/v1), 2025-08-07
Supplement: Supplementary file 1 [file 4f9384a5011727aa8f9b6343.docx]

| **Supplementary Table 1: The 48 variables included in this study, along with their remarks and sources.** | | | | |
| --- | --- | --- | --- | --- |
| **Variable Name** | | **Description** | | | |
| Demographic Factors (4)： | |  | | | |
| Sex | | 0: Male, 1: Female | | | |
| Age | | ≥20 years | | | |
| Poverty | | Poverty Income Ratio (PIR), range (0–5). | | | |
| Ratio of family income to the poverty threshold defined | | | |
| by the U.S. Census Bureau. | | | |
| Education | | Educational attainment: 1 = Less than high school education; 2 = High school graduate; 3 = More than high school education. | | | |
| Lifestyle Habits (3)： | |  | | | |
| Alcohol | | 0: Never drink alcohol; 1: Former or current drinker. | | | |
| Smoke | | 0: Never smoke; 1: Former or current smoker. | | | |
| Sleep hours | | Daily sleep duration (hours). | | | |
| Medical History (5)： | |  | | | |
| CKD | | 0: No chronic kidney disease; 1: Reported history of chronic kidney disease. | | | |
| OP | | 0: No osteoporosis; 1: Low bone mass; 2: Osteoporosis. | | | |
| CHD | | 0: No history of coronary heart disease; 1: Reported history of coronary heart disease. | | | |
| COPD | | 0: No history of chronic obstructive pulmonary disease; 1: Reported history of COPD. | | | |
| Sleep Disorder | | 0: No reported sleep disorder; 1: Reported sleep disorder. | | | |
| Physical Characteristics (3)： | |  | | | |
| BMI | | Body Mass Index. | | | |
| BRI | | Body Roundness Index.PMID: 32267621 | | | |
| BFP | | Body Fat Percentage.PMID: 38515375 | | | |
| Novel Composite Indices (9)： | |  | | | |
| ABSI | | A body shape index .PMID 32883969. | | | |
| CALLY | | C-reactive protein-albumin-lymphocyte index; PMID 34244053. | | | |
| DII | | Dietary Inflammatory Index.PMID: 38166986 | | | |
| SII | | Systemic Immune-Inflammation Index; PMID 25271081. | | | |
| TyG | | Triglyceride-Glucose Index; PMID 19067533. | | | |
| WHR | | Waist-Hip Ratio.PMID: 28272469 | | | |
| WHtR | | Waist-to-Height Ratio.PMID: 34056007 | | | |
| **Supplementary Table 2: All R software analysis packages and functions used in the data analysis of this study.** | | | |
| **Module** | **Function** | | **R Packages** |
| Data Cleaning | Variable inclusion and data screening | | nhanesR |
| Missing value handling | | mice (Multiple imputation) |
| Baseline Analysis | By overall, diseased (1) VS non - diseased (0) events | | compareGroups |
| By training set vs test set | | CBCgrps |
| Training set alone | | CBCgrps |
| Independent Variable Screening | Difference analysis | | CBCgrps; nortest |
| Univariate analysis | | stats |
| Lasso method | | glmnet |
| Multivariate Analysis | Multivariate Logistic regression analysis | | stats; forestplot; car (Calculate AIC/BIC/VIF) |
| Model Evaluation | Nomogram | | rms |
| Discrimination analysis | | pROC; fbroc (Bootstrap ROC) |
| Calibration analysis | | rms; riskregression |
| Decision curve analysis | | rmda; dcurves |
| Cross - Validation | Cross - validation | | caret |
| Machine Learning Algorithms | XGBoost | | xgboost (Modeling); pROC (ROC curve); rms (Calibration curve); rmda (DCA curve) |
| LightGBM | | lightgbm (Modeling); pROC (ROC curve); rms (Calibration curve); rmda (DCA curve) |
| CatBoost | | catboost (Modeling); pROC (ROC curve); rms (Calibration curve); rmda (DCA curve) |
| Random Forest,RF | | randomForest (Modeling); pROC (ROC curve); rms (Calibration curve); rmda (DCA curve) |
| K-Nearest Neighbor，KNN | | class (Modeling); pROC (ROC curve); rms (Calibration curve); rmda (DCA curve) |
| Naive Bayes，NB | | e1071 (Modeling); pROC (ROC curve); rms (Calibration curve); rmda (DCA curve) |
| Neural Network,NN | | nnet (Modeling); pROC (ROC curve); rms (Calibration curve); rmda (DCA curve) |
| Model Interpretation | Use Shap value to interpret model contribution | | kernelshap, shapviz (SHAP interpretation) |


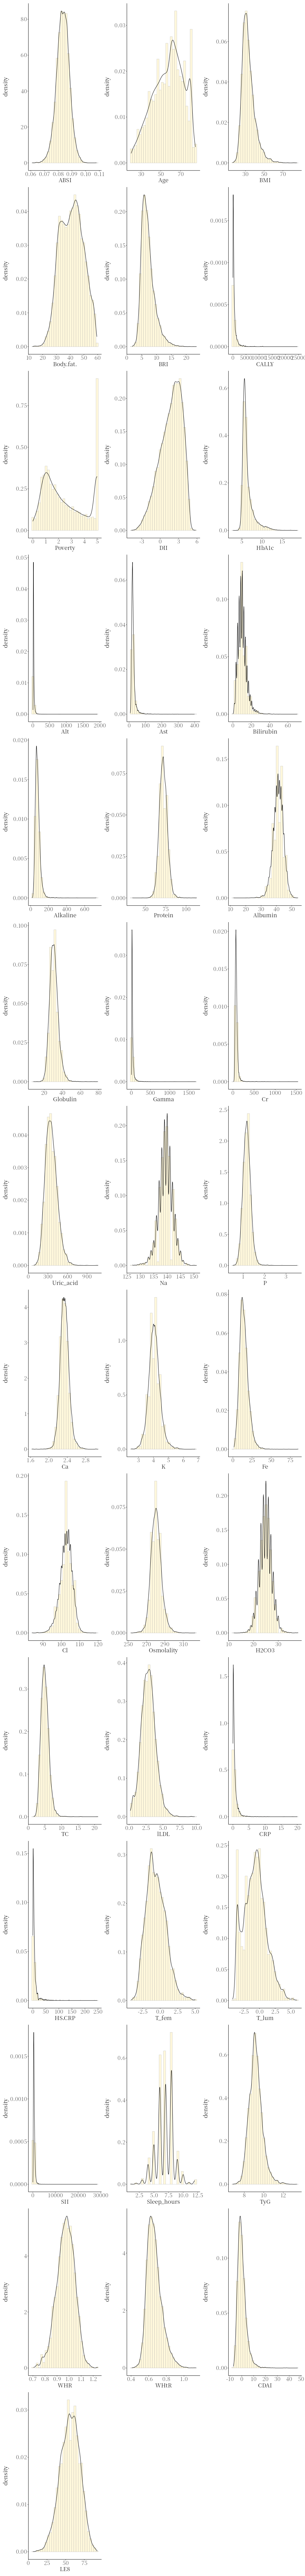


**Supplementary Figure 1 (violin graph) : The normality test of continuous variables shows that 33 items conform to a normal distribution, while the remaining 7 variables (CALLY, Alt, Ast, Gamma, CRP, HS_CRP, SII) are not normally distributed.**

| **Supplementary Table 3: Inter-group comparison between the training set and the test set groups.** | | | | |
| --- | --- | --- | --- | --- |
| **Variables** | **Total  (n = 13250)** | **Test  (n = 3975)** | **Train  (n = 9275)** | ***P*** |
|
| Age, Mean ± SD | 57.35 ± 15.28 | 57.27 ± 15.19 | 57.39 ± 15.31 | 0.668 |
| BMI, Mean ± SD | 33.23 ± 6.89 | 33.35 ± 7.09 | 33.18 ± 6.80 | 0.174 |
| Body fat, Mean ± SD | 41.12 ± 8.23 | 41.12 ± 8.23 | 41.12 ± 8.23 | 0.979 |
| BRI, Mean ± SD | 7.14 ± 2.27 | 7.18 ± 2.31 | 7.12 ± 2.25 | 0.185 |
| Poverty, Mean ± SD | 2.45 ± 1.57 | 2.49 ± 1.57 | 2.43 ± 1.57 | **0.024** |
| DII, Mean ± SD | 1.75 ± 1.77 | 1.74 ± 1.76 | 1.75 ± 1.77 | 0.673 |
| HbA1c, Mean ± SD | 6.38 ± 1.47 | 6.37 ± 1.51 | 6.38 ± 1.45 | 0.781 |
| Bilirubin, Mean ± SD | 10.32 ± 4.94 | 10.29 ± 4.87 | 10.33 ± 4.97 | 0.684 |
| Alkaline, Mean ± SD | 78.07 ± 28.78 | 77.64 ± 31.82 | 78.26 ± 27.37 | 0.262 |
| Protein, Mean ± SD | 71.96 ± 4.98 | 71.86 ± 4.93 | 72.00 ± 5.00 | 0.154 |
| Albumin, Mean ± SD | 41.22 ± 3.35 | 41.18 ± 3.28 | 41.23 ± 3.38 | 0.432 |
| Globulin, Mean ± SD | 30.75 ± 4.84 | 30.68 ± 4.78 | 30.77 ± 4.86 | 0.329 |
| Cr, Mean ± SD | 83.95 ± 48.51 | 83.06 ± 43.80 | 84.34 ± 50.39 | 0.164 |
| Uric acid, Mean ± SD | 352.02 ± 91.18 | 353.07 ± 91.44 | 351.58 ± 91.07 | 0.388 |
| Na, Mean ± SD | 139.44 ± 2.64 | 139.43 ± 2.63 | 139.44 ± 2.64 | 0.904 |
| P, Mean ± SD | 1.17 ± 0.18 | 1.17 ± 0.18 | 1.17 ± 0.18 | 0.559 |
| Ca, Mean ± SD | 2.34 ± 0.10 | 2.34 ± 0.10 | 2.34 ± 0.10 | 0.375 |
| K, Mean ± SD | 4.06 ± 0.39 | 4.06 ± 0.40 | 4.06 ± 0.39 | 0.782 |
| Fe, Mean ± SD | 14.52 ± 5.87 | 14.50 ± 5.90 | 14.53 ± 5.86 | 0.764 |
| Cl, Mean ± SD | 102.57 ± 3.38 | 102.57 ± 3.33 | 102.57 ± 3.39 | 0.936 |
| Osmolality, Mean ± SD | 280.63 ± 5.85 | 280.61 ± 5.75 | 280.64 ± 5.89 | 0.767 |
| H2CO3, Mean ± SD | 24.87 ± 2.50 | 24.88 ± 2.47 | 24.86 ± 2.51 | 0.626 |
| TC, Mean ± SD | 5.01 ± 1.19 | 5.02 ± 1.17 | 5.00 ± 1.20 | 0.526 |
| Lldl, Mean ± SD | 2.86 ± 1.06 | 2.86 ± 1.08 | 2.86 ± 1.06 | 0.731 |
| T fem, Mean ± SD | -0.57 ± 1.38 | -0.58 ± 1.38 | -0.57 ± 1.38 | 0.742 |
| T lum, Mean ± SD | -0.71 ± 1.76 | -0.73 ± 1.73 | -0.70 ± 1.77 | 0.386 |
| Sleep hours, Mean ± SD | 6.90 ± 1.51 | 6.91 ± 1.52 | 6.89 ± 1.51 | 0.6 |
| TyG, Mean ± SD | 9.18 ± 0.69 | 9.20 ± 0.69 | 9.17 ± 0.69 | 0.09 |
| WHR, Mean ± SD | 0.97 ± 0.07 | 0.97 ± 0.07 | 0.97 ± 0.07 | 0.124 |
| WHtR, Mean ± SD | 0.67 ± 0.08 | 0.67 ± 0.09 | 0.66 ± 0.08 | 0.205 |
| CDAI, Mean ± SD | 0.18 ± 3.73 | 0.22 ± 3.76 | 0.16 ± 3.71 | 0.424 |
| CALLY, M (Q₁, Q₃) | 299.13 (135.79, 665.94) | 293.33 (135.94, 664.77) | 302.11 (135.79, 666.58) | 0.39 |
| Alt, M (Q₁, Q₃) | 22.00 (16.00, 31.00) | 22.00 (16.00, 31.00) | 22.00 (16.00, 31.00) | 0.826 |
| Ast, M (Q₁, Q₃) | 22.00 (18.00, 28.00) | 22.00 (18.00, 28.00) | 22.00 (18.00, 27.00) | 0.996 |
| Gamma, M (Q₁, Q₃) | 24.00 (17.00, 38.00) | 24.00 (17.00, 38.00) | 24.00 (17.50, 38.00) | 0.742 |
| CRP, M (Q₁, Q₃) | 0.35 (0.16, 0.73) | 0.35 (0.16, 0.75) | 0.35 (0.16, 0.73) | 0.368 |
| HS CRP, M (Q₁, Q₃) | 3.67 (1.70, 7.13) | 3.64 (1.69, 7.10) | 3.70 (1.72, 7.17) | 0.613 |
| SII, M (Q₁, Q₃) | 486.58 (348.22, 695.25) | 483.20 (344.66, 689.37) | 489.10 (349.17, 697.92) | 0.219 |
| Sex, n(%) |  |  |  | 0.449 |
| Male | 6027 (45.49) | 1828 (45.99) | 4199 (45.27) |  |
| Female | 7223 (54.51) | 2147 (54.01) | 5076 (54.73) |  |
| Alcohol, n(%) |  |  |  | 0.746 |
| NO | 2228 (16.82) | 662 (16.65) | 1566 (16.88) |  |
| YES | 11022 (83.18) | 3313 (83.35) | 7709 (83.12) |  |
| CHD, n(%) |  |  |  | 0.816 |
| NO | 12138 (91.61) | 3638 (91.52) | 8500 (91.64) |  |
| YES | 1112 (8.39) | 337 (8.48) | 775 (8.36) |  |
| COPD, n(%) |  |  |  | 0.732 |
| NO | 12408 (93.65) | 3718 (93.53) | 8690 (93.69) |  |
| YES | 842 (6.35) | 257 (6.47) | 585 (6.31) |  |
| CKD, n(%) |  |  |  | 0.631 |
| NO | 9054 (68.33) | 2728 (68.63) | 6326 (68.20) |  |
| YES | 4196 (31.67) | 1247 (31.37) | 2949 (31.80) |  |
| Told doctor, n(%) |  |  |  | 0.558 |
| NO | 7529 (56.82) | 2274 (57.21) | 5255 (56.66) |  |
| YES | 5721 (43.18) | 1701 (42.79) | 4020 (43.34) |  |
| Smoke, n(%) |  |  |  | 0.457 |
| NO | 6782 (51.18) | 2015 (50.69) | 4767 (51.40) |  |
| YES | 6468 (48.82) | 1960 (49.31) | 4508 (48.60) |  |
| Education, n(%) |  |  |  | 0.113 |
| <High | 1764 (13.31) | 495 (12.45) | 1269 (13.68) |  |
| High | 5297 (39.98) | 1584 (39.85) | 3713 (40.03) |  |
| >High | 6189 (46.71) | 1896 (47.70) | 4293 (46.29) |  |
| OP, n(%) |  |  |  | 0.885 |
| NO osteoporosis | 6890 (52.00) | 2054 (51.67) | 4836 (52.14) |  |
| Low bone mass | 3634 (27.43) | 1097 (27.60) | 2537 (27.35) |  |
| Osteoporosis | 2726 (20.57) | 824 (20.73) | 1902 (20.51) |  |

| **Supplementary Table 4: Intra-group comparison of all variables in the training set,excluding indicators with no statistically significant differences (P < 0.05).** | | | | |
| --- | --- | --- | --- | --- |
| **Variables** | **Total (n = 9275)** | **0 (n = 7542)** | **1 (n = 1733)** | ***P*** |
|
| ABSI, Mean ± SD | 0.08 ± 0.00 | 0.08 ± 0.00 | 0.08 ± 0.00 | **<.001** |
| Age, Mean ± SD | 57.39 ± 15.31 | 55.72 ± 15.51 | 64.68 ± 11.98 | **<.001** |
| BMI, Mean ± SD | 33.18 ± 6.80 | 33.04 ± 6.70 | 33.77 ± 7.15 | **<.001** |
| Body fat, Mean ± SD | 41.12 ± 8.23 | 40.56 ± 8.22 | 43.53 ± 7.81 | **<.001** |
| BRI, Mean ± SD | 7.12 ± 2.25 | 7.01 ± 2.21 | 7.58 ± 2.36 | **<.001** |
| Poverty, Mean ± SD | 2.43 ± 1.57 | 2.41 ± 1.57 | 2.49 ± 1.53 | **0.048** |
| DII, Mean ± SD | 1.75 ± 1.77 | 1.74 ± 1.76 | 1.81 ± 1.81 | 0.13 |
| HbA1c, Mean ± SD | 6.38 ± 1.45 | 6.39 ± 1.50 | 6.35 ± 1.24 | 0.31 |
| Bilirubin, Mean ± SD | 10.33 ± 4.97 | 10.46 ± 5.02 | 9.78 ± 4.69 | **<.001** |
| Alkaline, Mean ± SD | 78.26 ± 27.37 | 78.11 ± 27.52 | 78.87 ± 26.73 | 0.3 |
| Protein, Mean ± SD | 72.00 ± 5.00 | 72.27 ± 4.97 | 70.81 ± 4.94 | **<.001** |
| Albumin, Mean ± SD | 41.23 ± 3.38 | 41.33 ± 3.37 | 40.79 ± 3.40 | **<.001** |
| Globulin, Mean ± SD | 30.77 ± 4.86 | 30.94 ± 4.84 | 30.03 ± 4.87 | **<.001** |
| Cr, Mean ± SD | 84.34 ± 50.39 | 83.73 ± 47.86 | 86.97 ± 60.14 | **0.016** |
| Uric acid, Mean ± SD | 351.58 ± 91.07 | 352.45 ± 91.25 | 347.78 ± 90.23 | **0.054** |
| Na, Mean ± SD | 139.44 ± 2.64 | 139.41 ± 2.58 | 139.56 ± 2.88 | **0.046** |
| P, Mean ± SD | 1.17 ± 0.18 | 1.17 ± 0.18 | 1.19 ± 0.19 | **<.001** |
| Ca, Mean ± SD | 2.34 ± 0.10 | 2.34 ± 0.10 | 2.35 ± 0.10 | **0.022** |
| K, Mean ± SD | 4.06 ± 0.39 | 4.06 ± 0.38 | 4.09 ± 0.41 | **0.001** |
| Fe, Mean ± SD | 14.53 ± 5.86 | 14.57 ± 5.96 | 14.37 ± 5.39 | 0.178 |
| Cl, Mean ± SD | 102.57 ± 3.39 | 102.65 ± 3.32 | 102.22 ± 3.67 | **<.001** |
| Osmolality, Mean ± SD | 280.64 ± 5.89 | 280.48 ± 5.76 | 281.35 ± 6.37 | **<.001** |
| H2CO3, Mean ± SD | 24.86 ± 2.51 | 24.79 ± 2.49 | 25.17 ± 2.59 | **<.001** |
| TC, Mean ± SD | 5.00 ± 1.20 | 5.01 ± 1.18 | 4.96 ± 1.26 | 0.082 |
| LDL-C, Mean ± SD | 2.86 ± 1.06 | 2.87 ± 1.06 | 2.83 ± 1.08 | 0.202 |
| T fem, Mean ± SD | -0.57 ± 1.38 | -0.52 ± 1.38 | -0.80 ± 1.37 | **<.001** |
| T lum, Mean ± SD | -0.70 ± 1.77 | -0.73 ± 1.76 | -0.57 ± 1.78 | **0.001** |
| Sleep hours, Mean ± SD | 6.89 ± 1.51 | 6.88 ± 1.50 | 6.94 ± 1.55 | **0.156** |
| TyG, Mean ± SD | 9.17 ± 0.69 | 9.19 ± 0.69 | 9.09 ± 0.66 | **<.001** |
| WHR, Mean ± SD | 0.97 ± 0.07 | 0.97 ± 0.07 | 0.97 ± 0.08 | **0.004** |
| WHtR, Mean ± SD | 0.66 ± 0.08 | 0.66 ± 0.08 | 0.68 ± 0.09 | **<.001** |
| CDAI, Mean ± SD | 0.16 ± 3.71 | 0.16 ± 3.73 | 0.18 ± 3.65 | 0.831 |
| LE8, Mean ± SD | 55.95 ± 13.01 | 56.38 ± 13.03 | 54.09 ± 12.76 | **<.001** |
| CALLY, M (Q₁, Q₃) | 302.11 (135.79, 666.58) | 311.17 (137.14, 675.00) | 282.41 (130.00, 616.88) | **0.025** |
| Alt, M (Q₁, Q₃) | 22.00 (16.00, 31.00) | 22.00 (17.00, 31.00) | 20.00 (15.00, 27.00) | **<.001** |
| Ast, M (Q₁, Q₃) | 22.00 (18.00, 27.00) | 22.00 (18.00, 28.00) | 22.00 (18.00, 26.00) | **<.001** |
| Gamma, M (Q₁, Q₃) | 24.00 (17.50, 38.00) | 25.00 (18.00, 38.00) | 23.00 (17.00, 36.00) | **<.001** |
| CRP, M (Q₁, Q₃) | 0.35 (0.16, 0.73) | 0.34 (0.16, 0.71) | 0.38 (0.17, 0.77) | **<.001** |
| HS CRP, M (Q₁, Q₃) | 3.70 (1.72, 7.17) | 3.67 (1.70, 7.08) | 3.74 (1.80, 7.50) | 0.173 |
| SII, M (Q₁, Q₃) | 489.10 (349.17, 697.92) | 482.07 (348.75, 686.94) | 523.56 (352.50, 736.28) | **<.001** |
| Sex, n(%) |  |  |  | **<.001** |
| Male | 4199 (45.27) | 3632 (48.16) | 567 (32.72) |  |
| Female | 5076 (54.73) | 3910 (51.84) | 1166 (67.28) |  |
| Alcohol, n(%) |  |  |  | 0.059 |
| NO | 1566 (16.88) | 1300 (17.24) | 266 (15.35) |  |
| YES | 7709 (83.12) | 6242 (82.76) | 1467 (84.65) |  |
| CHD, n(%) |  |  |  | **<.001** |
| NO | 8500 (91.64) | 7009 (92.93) | 1491 (86.04) |  |
| YES | 775 (8.36) | 533 (7.07) | 242 (13.96) |  |
| COPD, n(%) |  |  |  | **<.001** |
| NO | 8690 (93.69) | 7146 (94.75) | 1544 (89.09) |  |
| YES | 585 (6.31) | 396 (5.25) | 189 (10.91) |  |
| CKD, n(%) |  |  |  | **<.001** |
| NO | 6326 (68.20) | 5258 (69.72) | 1068 (61.63) |  |
| YES | 2949 (31.80) | 2284 (30.28) | 665 (38.37) |  |
| Told doctor, n(%) |  |  |  | **<.001** |
| NO | 5255 (56.66) | 4489 (59.52) | 766 (44.20) |  |
| YES | 4020 (43.34) | 3053 (40.48) | 967 (55.80) |  |
| Smoke, n(%) |  |  |  | **<.001** |
| NO | 4767 (51.40) | 3973 (52.68) | 794 (45.82) |  |
| YES | 4508 (48.60) | 3569 (47.32) | 939 (54.18) |  |
| Education, n(%) |  |  |  | **<.001** |
| <High | 1269 (13.68) | 1118 (14.82) | 151 (8.71) |  |
| High | 3713 (40.03) | 3039 (40.29) | 674 (38.89) |  |
| >High | 4293 (46.29) | 3385 (44.88) | 908 (52.39) |  |
| OP, n(%) |  |  |  | **<.001** |
| NO osteoporosis | 4836 (52.14) | 3982 (52.80) | 854 (49.28) |  |
| Low bone mass | 2537 (27.35) | 1967 (26.08) | 570 (32.89) |  |
| Osteoporosis | 1902 (20.51) | 1593 (21.12) | 309 (17.83) |  |
